# Supplementary material for: CRISPR-Mediated In Situ Introduction or Integration of F9-Padua in Human iPSCs for Gene Therapy of Hemophilia B
Source: MDPI journal article supplement (doi:10.3390/ijms24109013), 2023-05-19
Supplement: s1 [file s1]

**Table S2.** Primers used in this paper

| Name          | Forward (5'-3')                 | Reverse (5'-3')                  |
|---------------|---------------------------------|----------------------------------|
| Screen        | CAACCATGACATTGCCCTTCTGG         | GTGATTAGTTAGTGAGAGGCCCTG         |
| Screen-HB     | CAGACTCAAATCAGCCACAGTGG         | CGTGCTGGCTGTTAGACTCTTC           |
| HSA           | CTAGCTAGCGAACACGAATCTTTGGGAAC   | GTTCCCAAAGATTCGTGTTTCGCTAGCTAG   |
| Screen Left   | GCCATTCAATCGAGGAAGGATAGG        | CTGAATTATACCTCTTTGGCCGATTC       |
| Screen Right  | CAATGCGGCGGCTGCATA              | CCCCTAGGGAACCTCAACTGAGTAT        |
| OT1           | CACATTTGTTTCTCACAGGTCTGTG       | TTACTACATGGCTCTGTCCGATTGT        |
| OT2           | GGGTGTTATGACCTCAGCTGTAAT        | GCACACTATCCTGGTGGCC              |
| OT3           | CCCCAAATCTCAGAGAAAAAGCCT        | CAAAAGTCTTCAGAAGAATGCTGTCCT      |
| OT4           | ATGTCTCCTTTATTCCTACTGAGGTCAAT   | GTCAAATATGCATTTGTTTCAGGGGAG      |
| OT5           | CCTGAAAAGAAATGTTTTAAGAGCACTAAAG | GGCCCTGTGGTGACCTTCTA             |
| OT6           | CATGGTGCAAGCTAAGTCTAGCTTA       | GCAAAATGGACTGCATGCAAAG           |
| OT7           | CATGGTGTTTTTCACTGATTATCTTGC     | GAGGCATAAACTACTATATTCAATTGTCTGG  |
| OT8           | CTTAGTATGTACTACTCCACTGTTGTGT    | CCTACCTATTAGACCTCCTCTCTTGG       |
| OT9           | AGCCATCTATGCCTCTGGC             | GCAAGGTAAAAGTAATAGTTGATTGTAAATGT |
| OT10          | CCCCTGCAATCATTTGTTTCAGAT        | GTATTTTATGTAGAACTGCCTGCTTTTTATG  |
| ALB           | CGCTATTAGTTCGTTACACCA           | TTTACAACATTTGCTGCCCCA            |
| AFP           | TGGGACCCGAACCTTCCA              | GGCCACATCCAGGACTAGTTTC           |
| HNF4 $\alpha$ | CCAAGTACATCCCAGCTTTC            | TTGGCATCTGGGTCAAAG               |
| HPRT          | GACTTTGCTTTCCTTGGTCAGG          | AGTCTGGCTTATATCCAACACTTCG        |
