# Supplementary material for: CRISPR-Mediated In Situ Introduction or Integration of F9-Padua in Human iPSCs for Gene Therapy of Hemophilia B
Source: MDPI journal article supplement (doi:10.3390/ijms24109013), 2023-05-19
Supplement: s1 [file s1]

**Table S1.** SgRNAs designed on the website

| Name   | Sequences            |
|--------|----------------------|
| sgRNA1 | TAGATCGAAGACATGTGGCT |
| sgRNA2 | TTTGTAGATCGAAGACATG  |
| sgRNA3 | AGCAGATTGTGAAAGTGGTA |
| sgRNA4 | TTTCACAATCTGCTAGCAA  |
| sgRNA5 | TTGCTAGCAGATTGTGAAAG |
