# Supplementary material for: CRISPR-Mediated In Situ Introduction or Integration of F9-Padua in Human iPSCs for Gene Therapy of Hemophilia B
Source: MDPI journal article supplement (doi:10.3390/ijms24109013), 2023-05-19
Supplement: s1 [file s1]

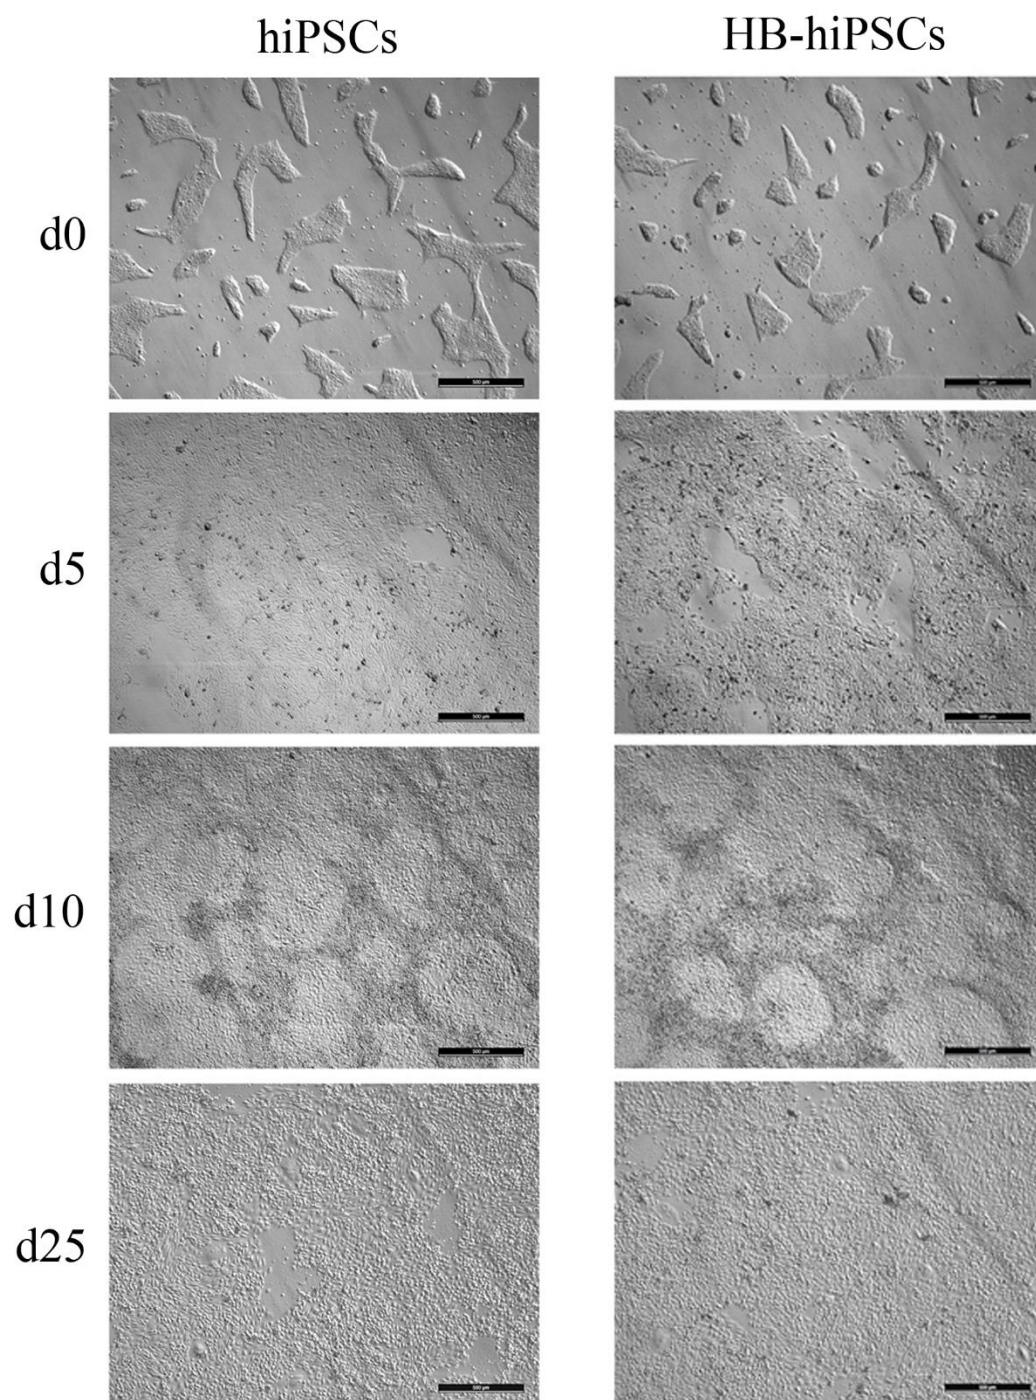

**Figure S2.** Images of cells captured on day 0, 5, 10 and 25 during the hepatic differentiation process. Scale bars, 500  $\mu\text{m}$ .
