# Supplementary material for: CRISPR-Mediated In Situ Introduction or Integration of F9-Padua in Human iPSCs for Gene Therapy of Hemophilia B
Source: MDPI journal article supplement (doi:10.3390/ijms24109013), 2023-05-19
Supplement: s1 [file s1]

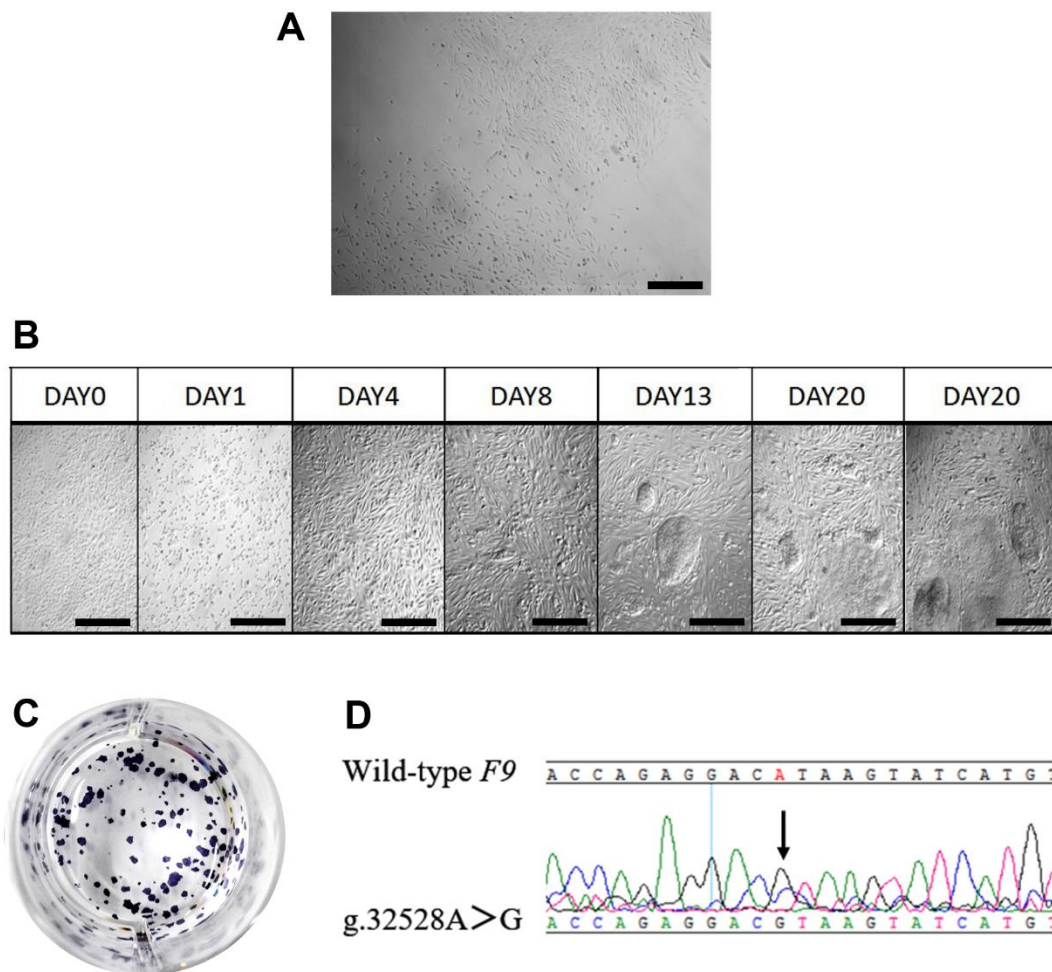

**Figure S1.** Reprogramming of patient-derived renal tubular epithelial cells into HB-hiPSCs. (A). Cell morphology of primary renal tubular epithelial cells collected from an HB patient. Scale bar, 200  $\mu$ m. (B). Cell morphology during the reprogramming process from day 0 (DAY0) to day 20 (DAY20). Scale bars, 200  $\mu$ m. (C). Alkaline phosphatase (ALP) staining of HB-hiPSCs. (D). Verification of the g.32528A > G mutation in the *F9* gene in HB-hiPSCs.
